# Supplementary material for: Physiological and Morphological Responses of the Temperate Seagrass Zostera muelleri to Multiple Stressors: Investigating the Interactive Effects of Light and Temperature
Source: PubMed Central journal article supplement (PMC3790674; doi:10.1371/journal.pone.0076377), 2013-10-04
Supplement: pone.0076377.s002.pdf [file pone.0076377.s002.pdf]

**Table A.** Repeated measures analysis of variance results for differences among treatments of effective quantum yield of PSII including data from all treatments.

| <b>Source</b>           | <b>df</b> | <b>MS</b> | <b>F</b> | <b>Sig.</b>      |
|-------------------------|-----------|-----------|----------|------------------|
| Within subject effects  |           |           |          |                  |
| Day                     | 7.3*      | 66645     | 17.94    | <b>&lt;0.001</b> |
| Day x shade             | 22.0*     | 4533      | 1.22     | 0.237            |
| Day x temp              | 14.7*     | 8446      | 2.27     | <b>0.007</b>     |
| day x shade x temp      | 44.0*     | 4418      | 1.19     | 0.219            |
| Error (day)             | 161.4*    | 3715      |          |                  |
| Between subject effects |           |           |          |                  |
| Shade                   | 3         | 143068    | 13.50    | <b>&lt;0.001</b> |
| Temp                    | 2         | 26079     | 2.46     | 0.109            |
| Shade x temp            | 6         | 5392      | 0.51     | 0.795            |
| Error                   | 22        | 10597     |          |                  |

\* Degrees of freedom adjusted using Greenhouse-Geiger correction

**Table B .** Repeated measures analysis of variance results for differences among treatments of effective quantum yield of PSII with data from 33° C treatments excluded.

| <b>Source</b>           | <b>df</b> | <b>MS</b> | <b>F</b> | <b>Sig.</b>      |
|-------------------------|-----------|-----------|----------|------------------|
| Within subject effects  |           |           |          |                  |
| Day                     | 2.5*      | 1113116   | 55.91    | <b>&lt;0.001</b> |
| Day x shade             | 7.4*      | 16213     | 0.81     | 0.584            |
| Day x temp              | 33.0*     | 291552    | 65.07    | <b>&lt;0.001</b> |
| day x shade x temp      | 22.3*     | 11403     | 0.57     | 0.930            |
| Error (day)             | 74.3*     | 19908     |          |                  |
| Between subject effects |           |           |          |                  |
| shade                   | 3         | 87031     | 5.81     | <b>0.003</b>     |
| temp                    | 3         | 4780992   | 319.15   | <b>&lt;0.001</b> |
| shade x temp            | 9         | 8219      | 0.55     | 0.827            |
| Error                   | 30        | 14980     |          |                  |

\* Degrees of freedom adjusted using Greenhouse-Geiger correction

**Table C.** Analysis of variance results for the J step in the fast induction curves (FICs) derived from PAM fluorometry of PSII in seagrass leaves.

| <b>Variable</b>            | <b>Factor</b> | <b>df</b> | <b>MS</b> | <b>F</b> | <b>Sig.</b>  |
|----------------------------|---------------|-----------|-----------|----------|--------------|
| <b>FIC (J-Step) Day 27</b> | Shade         | 3         | 0.02      | 2.245    | 0.102        |
|                            | Error         | 32        | 0.01      |          |              |
| <b>FIC (J-Step) Day 53</b> | Shade         | 3         | 0.02      | 5.106    | <b>0.005</b> |
|                            | Error         | 32        | 0.00      |          |              |
| <b>FIC (J-Step) Day 92</b> | Shade         | 3         | 0.02      | 3.754    | <b>0.020</b> |
|                            | Error         | 32        | 0.01      |          |              |

**Table D.** Analysis of variance results for differences among treatments of photosynthetic pigments in seagrass leaves at the culmination of the experiment.

| <b>Source</b>        | <b>Factor</b> | <b>df</b> | <b>MS</b> | <b>F</b> | <b>Sig.</b> |
|----------------------|---------------|-----------|-----------|----------|-------------|
| <b>Chlorophyll a</b> | Shade         | 3         | 48.75     | 0.132    | 0.94        |
|                      | Temperature   | 2         | 179.98    | 0.488    | 0.621       |
|                      | Shade x Temp  | 6         | 53.42     | 0.145    | 0.988       |
|                      | Error         | 22        | 369.09    |          |             |
| <b>Chlorophyll b</b> | Shade         | 3         | 38.18     | 0.577    | 0.636       |
|                      | Temperature   | 2         | 80.95     | 1.224    | 0.313       |
|                      | Shade x Temp  | 6         | 14.2      | 0.215    | 0.968       |
|                      | Error         | 22        | 66.12     |          |             |

**Table E.** Analysis of variance results for differences among treatments of photoprotective pigments in seagrass leaves at the culmination of the experiment.

| <b>Source</b>         | <b>Factor</b> | <b>df</b> | <b>MS</b> | <b>F</b> | <b>Sig.</b>  |
|-----------------------|---------------|-----------|-----------|----------|--------------|
| <b>Neoxanthin</b>     | Shade         | 3         | 0.01      | 0.02     | 0.997        |
|                       | Temperature   | 2         | 0.08      | 0.11     | 0.900        |
|                       | Shade x Temp  | 6         | 0.37      | 0.52     | 0.788        |
|                       | Error         | 22        | 0.71      |          |              |
| <b>Violaxanthin</b>   | Shade         | 3         | 0.59      | 0.30     | 0.826        |
|                       | Temperature   | 2         | 2.08      | 1.06     | 0.364        |
|                       | Shade x Temp  | 6         | 0.31      | 0.16     | 0.986        |
|                       | Error         | 22        | 1.97      |          |              |
| <b>Antheraxanthin</b> | Shade         | 3         | 0.01      | 0.10     | 0.957        |
|                       | Temperature   | 2         | 0.15      | 1.83     | 0.184        |
|                       | Shade x Temp  | 6         | 0.06      | 0.80     | 0.581        |
|                       | Error         | 22        | 0.08      |          |              |
| <b>Zeaxanthin</b>     | Shade         | 3         | 0.15      | 0.44     | 0.730        |
|                       | Temperature   | 2         | 1.21      | 3.50     | <b>0.047</b> |
|                       | Shade x Temp  | 6         | 0.24      | 0.71     | 0.648        |
|                       | Error         | 22        | 0.35      |          |              |
| <b>Lutein</b>         | Shade         | 3         | 0.08      | 0.02     | 0.996        |
|                       | Temp          | 2         | 2.21      | 0.55     | 0.586        |
|                       | Shade x Temp  | 6         | 0.8       | 0.20     | 0.974        |
|                       | Error         | 22        | 4.04      |          |              |
| <b>β Carotene</b>     | Shade         | 3         | 0.39      | 0.19     | 0.901        |
|                       | Temperature   | 2         | 0.29      | 0.14     | 0.870        |
|                       | Shade x Temp  | 6         | 0.25      | 0.12     | 0.992        |
|                       | Error         | 22        | 2.04      |          |              |

**Table F.** Analysis of variance results for differences among treatments in xanthophyll pool in seagrass leaves at the culmination of the experiment.

| Source                                                         | Factor       | df | MS   | F     | Sig.         |
|----------------------------------------------------------------|--------------|----|------|-------|--------------|
| <b>Total xanthophyll<br/>(V+A+Z)</b>                           | Shade        | 3  | 0    | 0.207 | 0.89         |
|                                                                | Temp         | 2  | 0    | 2.983 | 0.071        |
|                                                                | Shade x Temp | 6  | 0    | 0.943 | 0.485        |
|                                                                | Error        | 22 | 0    |       |              |
| <b>Epoxidation state</b>                                       | Shade        | 3  | 0.17 | 0.522 | 0.671        |
|                                                                | Temp         | 2  | 1.26 | 3.906 | <b>0.035</b> |
|                                                                | Shade x Temp | 6  | 0.25 | 0.758 | 0.61         |
|                                                                | Error        | 22 | 0.32 |       |              |
| <b>Zeaxanthin<br/>Relative concentration<br/>Z/(V+A+Z)</b>     | Shade        | 3  | 0.17 | 0.522 | 0.671        |
|                                                                | Temp         | 2  | 1.26 | 3.906 | <b>0.035</b> |
|                                                                | Shade x Temp | 6  | 0.25 | 0.758 | 0.61         |
|                                                                | Error        | 22 | 0.32 |       |              |
| <b>Antheraxanthin<br/>Relative concentration<br/>A/(V+A+Z)</b> | Shade        | 3  | 0    | 0.207 | 0.89         |
|                                                                | Temp         | 2  | 0    | 2.983 | 0.071        |
|                                                                | Shade x Temp | 6  | 0    | 0.943 | 0.485        |
|                                                                | Error        | 22 | 0    |       |              |
| <b>Violaxanthin<br/>Relative concentration<br/>V/(V+A+Z)</b>   | Shade        | 3  | 0.02 | 0.774 | 0.521        |
|                                                                | Temp         | 2  | 0.13 | 4.769 | <b>0.019</b> |
|                                                                | Shade x Temp | 6  | 0.04 | 1.321 | 0.289        |
|                                                                | Error        | 22 | 0.03 |       |              |

**Table G.** Repeated measures analysis of variance results for rate of leaf loss.

| Source                            | df    | MS    | F      | Sig.             |
|-----------------------------------|-------|-------|--------|------------------|
| Tests of Within-Subjects Effects  |       |       |        |                  |
| Day                               | 2.1*  | 47569 | 117.53 | <b>&lt;0.001</b> |
| Day x shade                       | 6.4*  | 469   | 1.16   | 0.343            |
| Day x temp                        | 6.4*  | 3221  | 7.96   | <b>&lt;0.001</b> |
| day x shade x temp                | 19.2* | 407   | 1.01   | 0.470            |
| Error (day)                       | 49.0* | 404   |        |                  |
| Tests of Between-Subjects Effects |       |       |        |                  |
| Shade                             | 3     | 1522  | 1.12   | 0.361            |
| Temp                              | 3     | 20092 | 14.78  | <b>&lt;0.001</b> |
| Shade x temp                      | 9     | 911   | 0.67   | 0.727            |
| Error                             | 23    | 1359  |        |                  |

\* Degrees of freedom adjusted using Greenhouse-Geiger correction

**Table H.** Analysis of variance results for differences among treatments in morphological traits of seagrass at the culmination of the experiment.

| <b>Source</b>                     | <b>Factor</b> | <b>df</b> | <b>MS</b> | <b>F</b> | <b>Sig.</b>      |
|-----------------------------------|---------------|-----------|-----------|----------|------------------|
| <b>Shoot biomass</b>              | Shade         | 3         | 1.382     | 7.902    | <b>0.001</b>     |
|                                   | Temp          | 2         | 2.253     | 12.879   | <b>&lt;0.001</b> |
|                                   | Shade x Temp  | 6         | .077      | .443     | 0.842            |
|                                   | Error         | 21        | .175      |          |                  |
| <b>Leaf length</b>                | Shade         | 3         | .118      | 2.622    | 0.076            |
|                                   | Temp          | 2         | .288      | 6.426    | <b>0.006</b>     |
|                                   | Shade x Temp  | 6         | .056      | 1.250    | 0.320            |
|                                   | Error         | 22        | .045      |          |                  |
| <b>Leaf width</b>                 | Shade         | 3         | .111      | 4.124    | <b>0.018</b>     |
|                                   | Temp          | 2         | .157      | 5.811    | <b>0.009</b>     |
|                                   | Shade x Temp  | 6         | .013      | 0.468    | 0.824            |
|                                   | Error         | 22        | .027      |          |                  |
| <b>Above / below ground ratio</b> | Shade         | 3         | .000      | 4.212    | <b>0.017</b>     |
|                                   | Temp          | 2         | .001      | 13.198   | <b>&lt;0.001</b> |
|                                   | Shade x Temp  | 6         | .000      | 2.327    | 0.068            |
|                                   | Error         | 22        | .000      |          |                  |
